# Supplementary material for: Reconfigurable OR and XOR logic gates based on dual responsive on–off–on micromotors
Source: Royal Society of Chemistry journal article supplement (doi:10.1039/c6nr00752j), 2016-01-01
Supplement: c6nr00752j1.pdf [file c6nr00752j1.pdf]

## Electronic Supplementary Information (ESI)

### **Reconfigurable OR and XOR logic gates based on dual responsive on-off-on micromotors**

*Yonggang Dong, Mei Liu, Hui Zhang, Bin Dong\**

Institute of Functional Nano & Soft Materials (FUNSOM), Jiangsu Key Laboratory for Carbon-Based Functional Materials & Devices, Soochow University, Suzhou, Jiangsu 215123, P. R. China, E-mail: [bdong@suda.edu.cn](mailto:bdong@suda.edu.cn)

**Video S1.** The motion of the hemisphere-like micromotor activated by UV light.

**Video S2.** The motion of the hemisphere-like micromotor is started by applying  $\text{NH}_3$  and stopped by HCl.

**Video S3.** The control experiment indicates the micromotor is actuated by  $\text{NH}_3$  instead of its airflow. When  $\text{NH}_3$  is applied, only the surfactant-containing hemisphere near the center moves; the other one at the upper left position which does not contain the surfactant is motionless.

**Video S4.** The video showing the micromotor motion when applying both UV and  $\text{NH}_3$  from the same side.

**Video S5.** The micromotor moves when UV is first applied and then decelerates and stops when  $\text{NH}_3$  is applied from the opposite direction.

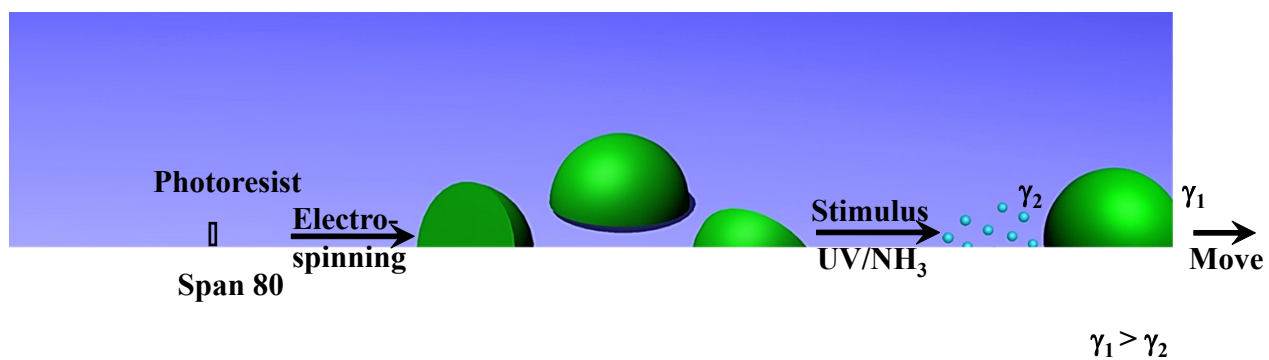

Fig. S1 Schematic illustration of the fabrication of the dual-responsive micromotor.

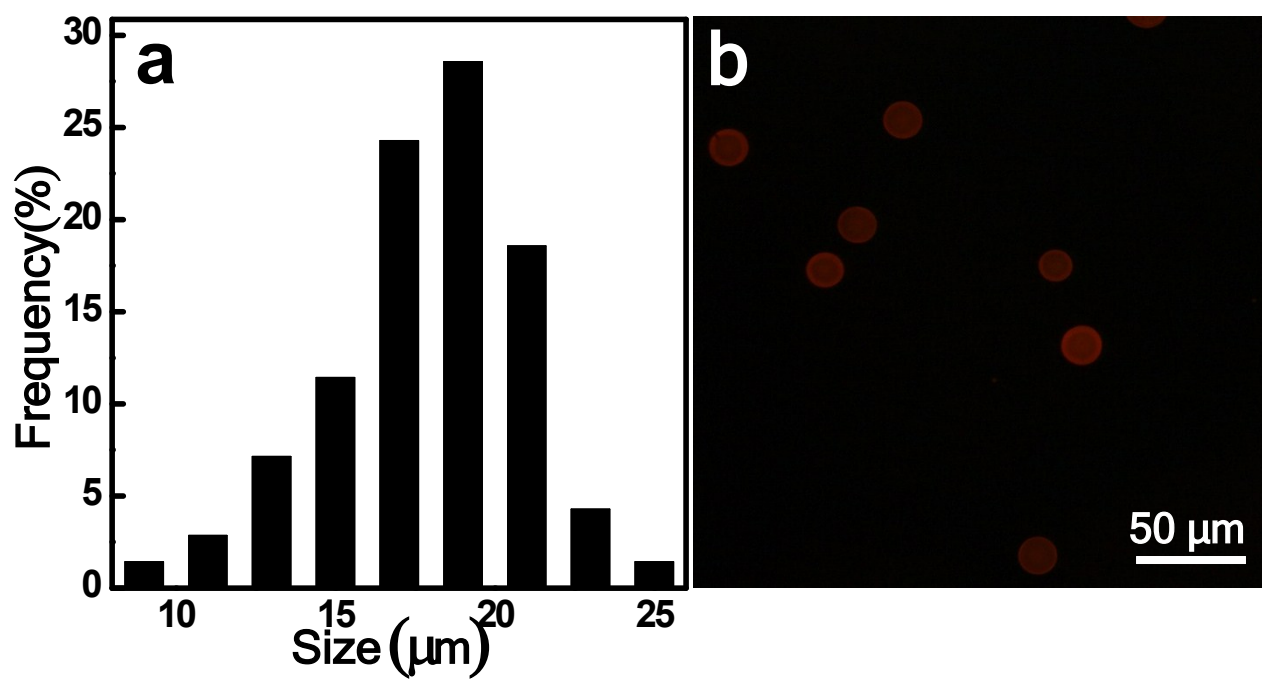

Fig. S2 (a) Size distribution histogram of the micromotor, which has an average diameter of approximately 19  $\mu\text{m}$ . (b) Fluorescence image of the micromotor containing a fluorescence dye.

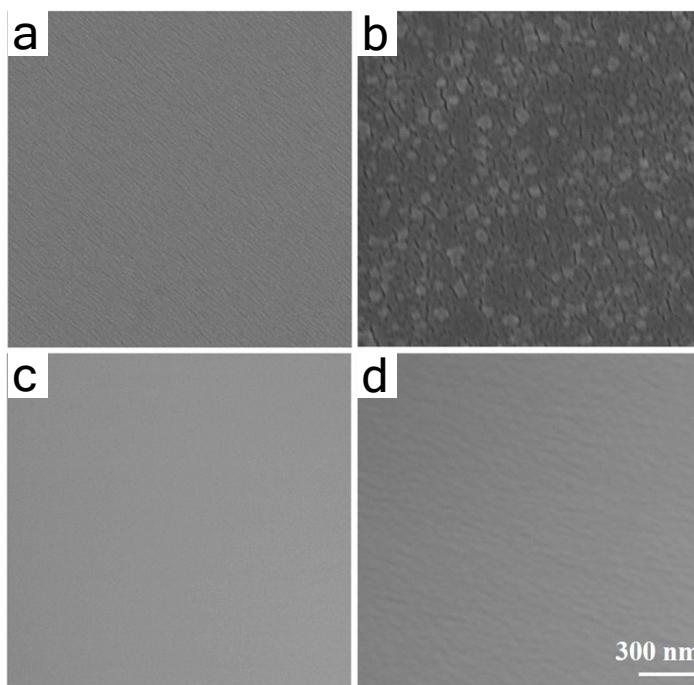

**Fig. S3** SEM images showing the surface morphology of the hemisphere-like micromotor: (a) before UV exposure; (b) after UV exposure for 60 s; (c) after soaking in the HCl solution for 30 s; (d) after soaking in the NH<sub>3</sub> solution for 30 s.

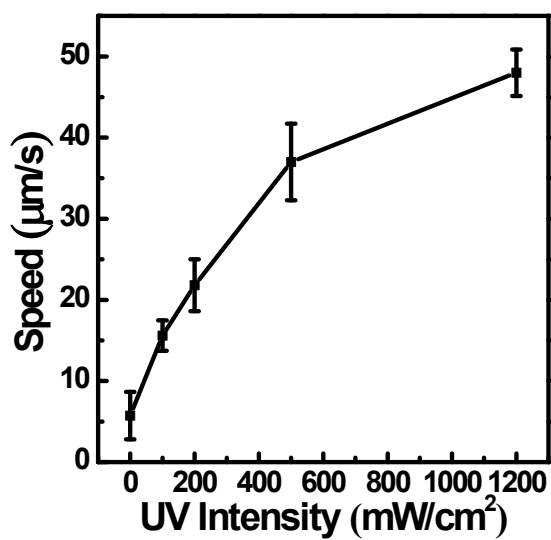

**Fig. S4** The dependence of the moving velocity on the UV intensity.

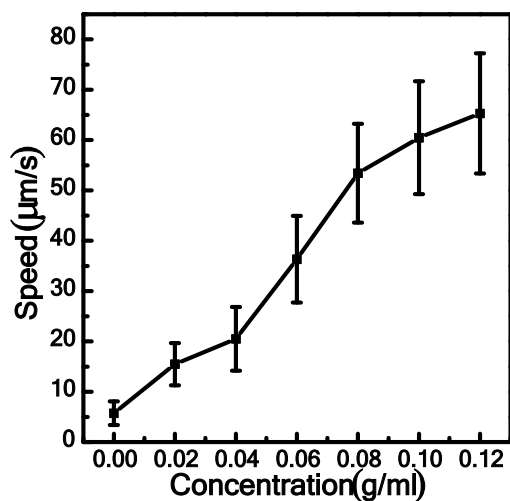

**Fig. S5** Dependence of the average moving velocity of the hemisphere-like micromotor on the concentration of span 80.

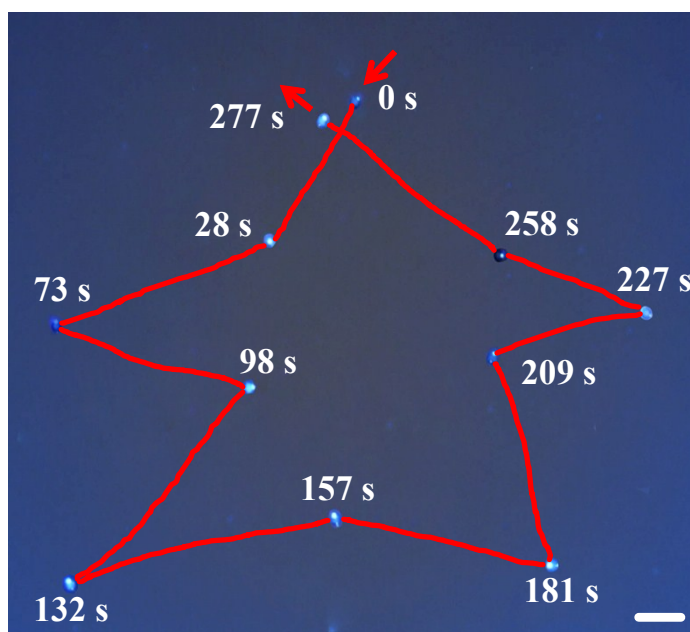

**Fig. S6** The motion of one hemisphere-like micromotor during 277 s under the influence of UV light. The UV light is utilized to control its on-off-on motion and moving direction, so that a pentagram shaped trajectory is obtained. Scale bar is 100 μm.
